# 1 **Characterization and mitigation of aerosols** 2 **and splatters from ultrasonic scalers**

3  
4 Qisheng Ou<sup>1,\*</sup>, Rafael Grazzini Placucci<sup>1,\*</sup>, Judy Danielson<sup>2</sup>, Gary Anderson<sup>2,†</sup>, Paul Olin<sup>3</sup>, Paul  
5 Jardine<sup>4</sup>, John Madden<sup>3</sup>, Qinghui Yuan<sup>5</sup>, Timothy H. Grafe<sup>5</sup>, Siyao Shao<sup>1</sup>, Jiarong Hong<sup>1</sup>, and  
6 David Y.H. Pui<sup>1,6</sup>  
7

8 <sup>1</sup>Department of Mechanical Engineering, University of Minnesota, Minneapolis, MN 55455, USA

9 <sup>2</sup>Department of Developmental and Surgical Sciences, University of Minnesota, Minneapolis,  
10 MN 55455, USA

11 <sup>3</sup>Department of Restorative Sciences, University of Minnesota, Minneapolis, MN 55455, USA

12 <sup>4</sup>Department of Diagnostic and Biological Sciences, University of Minnesota, Minneapolis, MN  
13 55455, USA

14 <sup>5</sup>Donaldson Company, Inc. Minneapolis, MN 55431

15 <sup>6</sup>School of Science and Engineering, The Chinese University of Hong Kong, Shenzhen,  
16 Guangdong, 518172, China

17  
18 \* equal contribution

19 † corresponding author  
20

21 **Abstract:**

22 **Background:** Dental procedures often produce aerosols and splatter which have the potential to  
23 transmit pathogens such as SARS-CoV-2. The existing literature is limited.

24 **Methods:** Aerosols and splatter were generated from an ultrasonic scaling procedure on a dental  
25 mannequin and characterized by two optical imaging methods – digital inline holography (DIH)  
26 and laser sheet imaging (LSI). Capture efficiencies of various aerosol mitigation devices were  
27 evaluated and compared.

28 **Results:** The ultrasonic scaling procedure generates a wide size range of aerosols up to a few  
29 hundred micrometers and occasional large splatter which emit at low velocity (mostly below 3  
30 m/s). Use of a saliva ejector (SE) and high-volume evacuator (HVE) resulted in 63% and 88% of  
31 overall reduction respectively while an extraoral local extractor (ELE) resulted in a reduction of  
32 96% at the nominal design flow setting.

33 **Conclusions:** The study results showed that the use of ELE or HVE significantly reduced aerosol  
34 and splatter emission. The use of HVE generally requires an additional person to assist a hygienist,  
35 while an ELE can be operated “hands-free” when a dental hygienist is performing ultrasonic  
36 scaling and other operations.

37 **Practical Implications:** An extraoral local extractor aids in the reduction of aerosols and splatters  
38 during ultrasonic scaling procedures, potentially reducing transmission of oral or respiratory  
39 pathogens, like SARS-CoV-2. Position and airflow of the device are important to effective aerosol  
40 mitigation.

41

42 **Key Words:** Aerosol-generating procedures, splatter, high-volume evacuation, extraoral local  
43 extractor, dental aerosols, ultrasonic scaling

44

## 45 Introduction

46 There is a general consensus that aerosols are one of the major paths of transmission for SARS-  
47 CoV-2 in the current pandemic<sup>1</sup>. This has led to concerns for health care workers involved in  
48 procedures which generate aerosols<sup>2-5</sup>. Dental providers are thought to be at particular risk due  
49 to the generation of aerosols and splatters<sup>6-10</sup> during dental procedures such as ultrasonic  
50 cleaning and high-speed, water-cooled tooth preparation. The dental profession has responded  
51 with increased use of personal protection equipment (PPE) and recommendations to avoid  
52 aerosol generating procedures such as ultrasonic scaling. Current industry guidelines for  
53 addressing airborne risks focus on increased ventilation (or air changes per hour (ACH)), portable  
54 room filtration systems (not at the source), the avoidance of discretionary aerosol-generating  
55 procedures (AGPs), and adding time between patients and procedures to allow for increased  
56 ventilation<sup>6,7,11</sup>. These measures have understandably placed increased burden on the oral health  
57 care system and are based on limited data regarding the generation and mitigation of dental  
58 aerosols. Recommendations about mitigation of airborne contaminants in other occupational  
59 settings suggest that capture of contaminants near the source is far superior to general ventilation  
60 and/or use of PPE<sup>12</sup>.

61 There is a serious deficiency in the literature regarding the risks posed by aerosols and splatter  
62 from aerosol-generating procedures (AGPs) in dental settings and the efficacy of various aerosol  
63 mitigation techniques. A number of studies have collected aerosols and splatters directly onto a  
64 collecting surface for subsequent analysis, which include fluorescent<sup>13-17</sup> or non-fluorescent<sup>18-20</sup>  
65 based chromatic indicators and microbiological methods using culture media<sup>21-24</sup>. These studies  
66 are limited by their inefficient collection of small size aerosols (<~50  $\mu\text{m}$ ) which do not provide a  
67 comprehensive characterization over the entire size spectrum. This is especially important as  
68 smaller aerosols may carry SARS-CoV-2 virus (0.06 -0.14  $\mu\text{m}^{25}$ ). Some investigations have used  
69 aerosol sampling techniques<sup>21,26-31</sup>, but suffer from limited sampling of large aerosols and  
70 splatters or incorrect use of the sampling devices.

71 Dental procedures generate both aerosols and splatter. Without a commonly recognized size  
72 threshold, splatters are generally considered to be large droplets and/or debris that is heavy  
73 enough to settle rapidly without spreading a long distance. Aerosols, on the other hand, are small  
74 droplets that can become smaller through evaporation and result in smaller residual aerosols (10  
75 microns in size or smaller) that may stay suspended in air indefinitely since they are sufficiently  
76 small to overcome gravitational settling, especially in a thermally stratified indoor environment<sup>32-</sup>  
77 <sup>34</sup>. Although most of these residual aerosols are the result of the supplied cooling water, they can  
78 include patient saliva, dental plaque, calculus, and blood, which can be infectious to dental  
79 practitioners or other dental patients if a patient carries SARS-CoV-2 or other infectious agents.  
80 Since a droplet's ability to spread and subsequently be inhaled strongly depends on its original  
81 size and evaporation process, a comprehensive size characterization of the original droplets and  
82 the residual aerosols is essential in risk assessment of AGPs. Such a comprehensive assessment  
83 has not been reported yet to our best knowledge.

84 One example of a common dental hygiene procedure which is being avoided during the pandemic  
85 due to aerosol generation is ultrasonic scaling for dental prophylaxis<sup>4</sup>. This ultrasonic scaling  
86 technology increases the efficiency of dental hygienists and is much less physically demanding  
87 than manual scaling. Dental hygienists are at risk for repetitive stress injuries and the ban on  
88 ultrasonic scaling procedures makes this more likely. The reduced efficiency of manual scaling  
89 also increases the time the patient is seating in the dental chair and for some patients may  
90 increase the number of appointments needed. High-volume evacuation (HVE) is reported to  
91 reduce aerosol contamination considerably<sup>23,35,36</sup>, but it is generally not used by dental hygienists  
92 without an additional assistant to hold, position and manipulate the end of the HVE. Extraoral  
93 local extractors (ELE) have been discussed and marketed since the beginning of this pandemic,  
94 but the evidence supporting their effectiveness is rare<sup>37,38</sup> and details about the proper design,  
95 configuration and use of ELEs has not been studied and reported.

96 We conducted this experiment to provide detailed physical characterizations of aerosols and  
97 splatters from ultrasonic scaling processes using novel *in-situ* optical methods. The methods were  
98 further used to evaluate the effectiveness of a variety of dental aerosol mitigation devices.

## 99 **Methods**

100 Digital Inline Holography (DIH) and Laser Sheet Imaging (LSI) were used to characterize the size  
101 and velocity of aerosols and splatters from an ultrasonic scaling procedure. DIH can be leveraged  
102 to image particles larger than 6  $\mu\text{m}$  but is limited to a small sample volume. On the other hand,  
103 LSI is not capable of distinguishing particle sizes, but can be used to count particles in a wide  
104 field of view. The combination of DIH and LSI measurements was therefore employed for more  
105 holistic insight into the generation and mitigation of aerosols during the dental procedure. This  
106 also provided an effective methodology for the evaluation of various aerosol mitigation strategies  
107 and devices.

### 108 **Digital Inline Holography (DIH)**

109 Near-field *in situ* holographic measurements were conducted using a DIH setup consisting of a  
110 laser, a digital camera, as well as beam expanding, collimating and condensing optics. A dental  
111 mannequin with thermoplastic teeth was placed on a horizontal surface facing upwards to mimic  
112 a patient during the dental procedure. The center of the DIH sample volume ( $15.6 \times 13.0 \times 250 \text{ mm}^3$ )  
113 was located approximately 8 mm above the mannequin's mouth opening (Figure 1).

114 The hybrid hologram processing method proposed by Shao et al.<sup>39</sup>, consisting of image  
115 enhancement, digital reconstruction, particle segmentation and post-processing was used to  
116 obtain the size distribution of particles passing through the DIH sample volume during simulated  
117 dental procedures.

### 118 **Simulated Ultrasonic Scaling**

119 A dental hygienist simulated supragingival scaling of the facial surfaces of the upper incisors and  
120 the lingual surfaces of the lower incisors using an ultrasonic scaler (Dentsply Sirona Cavitron ®

121 Plus with 30K FSI-1000 inserts) operating at the medium power setting while the holographic  
122 sensor (35 fps, 13  $\mu$ s exposure) acquired 10-second videos for a total of three trials. Clinically  
123 ultrasonic scaling in these dental regions generates the most splatters and aerosols.

#### 124 **Tested Mitigation Devices and Strategies**

125 Various mitigation devices were subsequently tested including a saliva ejector (SE, operated by  
126 the hygienist), a high-volume evacuation (HVE, operated by a second person) and an extraoral  
127 local extractor (ELE, BOFA DentalPro Aerosol UVC) at two different flow rates, 100 m<sup>3</sup>/h and 220  
128 m<sup>3</sup>/h. Different aerosol mitigation devices, and combinations thereof, were employed during the  
129 simulated procedure. For the mitigation measurements the saliva ejector and HVE were used  
130 adjacent to the operating field as is typical of clinical practice. The ELE nozzle was tested at two  
131 distances from the mouth of the mannequin, 14 cm and 18 cm. The 14 cm distance was felt to be  
132 the most effective nozzle placement based on the recommendations of dental hygienists who  
133 collaborated with the manufacturer of the tested ELE through informal clinical testing. The 18 cm  
134 distance was investigated to further assess the impact of ELE nozzle position on aerosol  
135 mitigation.

#### 136 **Laser Sheet Imaging (LSI)**

137 Far-field *in situ* laser sheet imaging was conducted using the setup illustrated in Figure 2, which  
138 comprised of a high-resolution camera coupled with an image intensifier and an imaging lens, as  
139 well as a light sheet generating system. The dental mannequin was placed in a horizontal surface  
140 facing upwards in a fashion similar to the previous setup. The light sheet generating system was  
141 placed 80 cm to the side of the center of the camera's field of view (FOV) and used to generate  
142 a light sheet that crossed the mannequin's head just above its mouth opening and below its nose.  
143 The camera module, located 60 cm away from the mannequin, was oriented perpendicularly to  
144 the light sheet and focused to achieve a FOV of 40×40 cm<sup>2</sup>. Additional measures were taken to  
145 ensure the signal to noise ratio was maximized, such as spray-painting the mannequin head and  
146 implementing a light trap to diminish background reflection.

147 Recorded images were converted grayscale and enhanced using background subtraction. The  
148 plume of aerosol generated during the procedure was segmented by employing an entropy filter,  
149 and the total pixel intensity of the plume area was measured and compared to the mitigation-free  
150 test trial to obtain the device's capture efficiency.

151 The ultrasonic scaling simulation and the mitigation techniques were tested with LSI in the same  
152 manner previously described with DIH. This provided a complementary broader field of view for  
153 the generated droplets and aerosols, as well as their mitigation.

## 154 **Results**

### 155 **Digital Inline Holography (DIH)**

#### 156 *Droplet size distribution*

157 The observed droplet generation of the ultrasonic scaler was very dynamic consisting of a  
158 relatively continuous generation of a plume of small droplets (aerosols) with occasional large  
159 splatters shooting out at high speed. Like many other liquid-films broken up by mechanical forces,  
160 a wide range of droplet sizes was observed with DIH with more than 99% falling between 12 to  
161 200  $\mu\text{m}$  (Figure 3). Splatters larger than 200  $\mu\text{m}$  were much less prevalent and were highly  
162 dependent on the positioning and movement of the ultrasonic scaler tip on teeth. The number  
163 mode (size with the highest number concentration) of the size distributions were 55  $\mu\text{m}$  when  
164 working on the facial surfaces of teeth #8 & 9 and 34  $\mu\text{m}$  for the lingual surfaces of teeth #24 &  
165 25). Total droplet concentration was 114 particles per cubic centimeter (CC) for teeth #8 and 9  
166 and 42 particles/CC for teeth #24 & 25. The lower concentration for teeth #24 and 25 was due to  
167 the more confined space trapping droplets inside the mouth of the mannequin. The concentration  
168 difference between the two sites was more pronounced for larger size droplets.

#### 169 *Droplet velocity*

170 More than 65% of the droplets had a velocity below 1 m/s and less than 2% of the droplets had a  
171 velocity greater than 3 m/s (See Figure 4). The low average droplet velocity observed here

172 suggests a suction-based point-of-source mitigation strategy is possible and may be more  
173 effective than a whole-room-ventilation-based mitigation. A 3-D mapping of the velocity profile  
174 (not shown) suggested there was no dominant direction of droplet travel.

### 175 *Capture efficiency of mitigation devices*

176 The capture efficiency of various mitigation devices is presented in Figure 5. The size dependent  
177 capture efficiency was determined by comparing the measured droplet size distribution with the  
178 mitigation device(s) applied with that measured when no mitigation was applied. There was a  
179 clear trend of decreased capture efficiency with increased droplet size. For the particular field of  
180 view of the DIH in this experiment, all mitigation devices but one (saliva ejector) demonstrated  
181 greater than 95% of capture for droplets up to 90  $\mu\text{m}$ . The capture efficiency dropped to  $\sim 80\%$   
182 and  $\sim 50\%$  at 120 and 150  $\mu\text{m}$ , respectively. The previously described irregular generation of  
183 large splatters made a statistically meaningful quantification of capture efficiency impossible at  
184 droplet size larger than 180  $\mu\text{m}$ . As previously discussed, droplets and aerosols smaller than 150  
185  $\mu\text{m}$  are the focus of any mitigation strategies given their high potential for longer-distance travel  
186 and transmission of SARS-CoV-2 and other airborne infectious agents.

### 187 **Laser Sheet Imaging (LSI)**

188 LSI provided a larger field assessment of the tested mitigation strategies with more  
189 comprehensive visualization of their effect on aerosol and splatter spread. A sample video clip of  
190 LSI is provided in supplementary information, in which a local extractor was off first and turned on  
191 for  $\sim 10$  seconds and then turned off again to demonstrate its effectiveness. When no mitigation  
192 device was deployed, the plume (mainly clusters of small droplets at low speed) shows a swirling  
193 movement representing the vortexing flow generated by an ultrasonic scaler tip moving at high  
194 frequency. Larger splatters were generated occasionally (larger and brighter dots in the video)  
195 shooting out at higher speed. When the local extractor was turned on, the signal of both the plume  
196 and the distinct splatters were significantly suppressed, with a clear sign of the plume being drawn  
197 towards the opening of the extractor. Occasional splatters were still observed, consistent with the



198 size-dependent capture observed by DIH that droplets with large momentum (larger size and/or  
199 higher speed) have relatively higher chance to escape from the capture of a mitigation device.  
200 Without distinguishing individual particles and their sizes, an overall capture efficiency was  
201 obtained from LSI data for each mitigation device (or their combinations) as shown in Figure 6.  
202 Among saliva ejector, HVE, and ELE at 14 cm working distance, saliva ejector had the lowest  
203 capture efficiency at 63%, followed up the local extractor at low flow setting (74%). HVE showed  
204 a higher capture efficiency at 88%. The ELE operating at high speed setting provided the best  
205 capture with an efficiency of 96%. A combination of local extractor at high flow setting with either  
206 saliva ejector (94%) or HVE (95%) did not provide additional improvement in capture efficiency,  
207 which implies the best mitigation strategy may be to use a local extractor (with proper flow setting,  
208 nozzle design, and placement relative to the patient and their oral cavity).  
209 The reported efficiencies for LSI were consistently lower than those by DIH at size from 30 to 120  
210  $\mu\text{m}$ , which can be explained by two reasons: (1) the existence of large splatters (with lower capture  
211 efficiency) in LSI video reduces the overall efficiency since a single large splatter contributes more  
212 intensity signal than a small droplet; and (2) the differences in size and position of the field of view  
213 between DIH and LSI result in characterizations of different portions of aerosol and splatter  
214 populations from the same source.  
215 When the local extractor was moved 4 cm further away (from 14 to 18 cm) from the generation  
216 site, its capture efficiency dropped substantially from 74% to 38% at low flow setting, and from  
217 96% to 56% at high flow setting.

## 218 **Discussion**

219 Dental aerosols and splatters are an important potential transmission mode for many pathogens,  
220 including SARS-CoV-2, and it is vital to understand their generation profile and transportation  
221 behaviors in air to support the risk assessment and aerosol mitigation in the current COVID-19

222 pandemic. The combination of the DIH and broader field of LSI provided important complementary  
223 characterization of aerosols generated by an ultrasonic scaling with and without mitigation.

#### 224 **Ultrasonic Scaler Aerosol Characterization**

225 Among various engineering parameters, the size and velocity of original droplets are the most  
226 important ones that influence how they spread, evaporate, and their ability of being inhaled to  
227 cause potential aerosol transmission. To our best knowledge, this study characterizes these two  
228 important droplet properties for the first-time using novel *in-situ* optical methods. We demonstrate  
229 the wide spread of droplet sizes and the presence of both small and large droplets in the  
230 population. Small aerosols ( $< \sim 50 \mu\text{m}$ ) are not sampled effectively by any impingement-based  
231 collection surface especially when their velocity is low due to the lack of momentum in air. Our  
232 findings suggest these small aerosols likely have been overlooked in previous studies employing  
233 surface collection methods for droplet sampling.

234 The droplet size and velocity reported here are properties measured close to their generation site  
235 outside of the oral cavity. When they travel further in the air, the droplets evaporate to significantly  
236 smaller size and the velocity relaxes close to the movement of the surrounding air. In view of the  
237 respiratory disease transmission, particles smaller than  $10 \mu\text{m}$  (the size after droplets have  
238 reduced in size due to evaporation) pose more risk than larger ones since they are more likely to  
239 remain suspended in air<sup>40</sup>, to bypass a face shield, to penetrate through face masks /  
240 respirators<sup>41-43</sup>, and be inhaled and deposited in the respiratory tract. The residual particle size  
241 depends on the size and composition of the original droplets. For dental generated droplets,  
242 especially ultrasonic scaling, this is dominated by dissolved solid impurities in the cooling water  
243 which is typically tap water filtered with a bacterial filter. Assuming a total dissolved solid (TDS)  
244 level of 350 ppm for a typical tap water<sup>44,45</sup>, a droplet with a  $142\text{-}\mu\text{m}$  original size dries into a  $10$   
245  $\mu\text{m}$  solid residual, suggesting droplets smaller than  $\sim 150 \mu\text{m}$  should receive more attention in  
246 dental aerosol mitigation. Larger droplets, however, can deposit onto ground, dental chairs and  
247 other equipment, bodies of patients or dental operators, surfaces of face shield, face mask, or

248 respirators, causing potential surface contamination. These findings therefore support the  
249 continued use of enhanced PPE in addition to regular surface cleaning and disinfection. The  
250 optical methods used in this study focus on initial droplets greater than 12  $\mu\text{m}$  since any droplets  
251 smaller can be effectively mitigated as suggested by the size-dependent capture efficiency shown  
252 in Figure 5.

### 253 **Aerosol Mitigation**

254 The ultrasonic scaler did produce omnidirectional droplets as expected, due to the high-frequency  
255 oscillation of the ultrasonic tip. However, aerosol mitigation was demonstrated and the ELE was  
256 very effective as compared to the more traditional clinical mitigation strategies without the need  
257 for additional personnel. It was clear that proper positioning of the nozzle and airflow of the ELE  
258 are of great importance but could be accomplished without impeding the work position of the  
259 dental hygienist.

260 The low average droplet velocity observed in this study suggests suction-based point-of-source  
261 mitigation strategies such as those tested may be more effective than whole-room-ventilation-  
262 based mitigation as has been recommended in other settings<sup>12,46</sup>. The ELE works in a similar  
263 principle as a saliva ejector or an HVE, but at a higher flowrate and a longer working distance.  
264 Unlike an HVE, it can be designed to remain in a fixed position, so an extra assistant is not needed  
265 to operate it.

266 It should be noted that room ventilation provided by heating, ventilation and air conditioning  
267 systems (HVAC) alone would require significantly higher flow for aerosol mitigation due to lack of  
268 focus on contamination sources. And it is possible that air ventilation provided by an HVAC system  
269 could contribute to aerosol spread rather than mitigation, as an aerosol could travel throughout  
270 an entire room before eventually being vented by the room HVAC system (where it may be  
271 recirculated if not properly filtered.) With ELE, however, the majority of contaminants are captured  
272 by the ELE at the source and subsequently filtered.

### 273 **Dental Aerosol and Infection Risk**

274 Not every aerosol or splatter from ultrasonic scalers carries pathogens, so the emission profiles  
275 measured in this study represent a worst-case scenario, which need to be combined with a  
276 biological property evaluation for a more comprehensive risk assessment in the future. Since our  
277 knowledge on the infective dose of SARS-CoV-2 required to cause COVID-19 is still limited, it is  
278 difficult to draw definitive conclusions as to the risks posed by dental aerosols and splatters and  
279 if the reported efficacy of the mitigation devices is sufficient. It is therefore recommended that  
280 multiple mitigation strategies be employed to minimize the risk of dental aerosol transmission.  
281 The authors also recommend that dental practitioners continue to use enhanced PPE in addition  
282 to other aerosol mitigation techniques.

## 283 **Conclusions**

284 Results of this study provide a scientific basis for risk assessment of aerosols and splatters from  
285 ultrasonic scaling. The engineering approaches of size and velocity profile characterization offer  
286 insight from a different angle – small aerosols which may be overlooked by a good number of  
287 previous studies can pose higher risk in terms of infection disease transmission through aerosol  
288 route, especially with the current COVID-19 pandemic. Implementing a hands-free extraoral local  
289 extractor can assist dental hygienists in implementing an effective, ergonomically sound method  
290 to reduce dental aerosols and splatters. Further research is needed on the biological property of  
291 these emissions for a comprehensive risk assessment. The methods in this work can be applied  
292 in the future to characterization of other AGPs in dental and medical settings to develop safe and  
293 efficient clinical practices in the face of highly contagious air-borne diseases. Future investigations  
294 will include assessment of water-cooled high-speed handpieces, as well as the interplay of point  
295 of source mitigation and clinical HVAC systems.

296

## 297 **References**

- 298 1. Karia R, Gupta I, Khandait H, Yadav A, Yadav A. COVID-19 and its Modes of Transmission. *SN*  
299 *Compr Clin Med*. 2020;2(10):1798-1801. doi:10.1007/s42399-020-00498-4
- 300 2. Harding H, Broom A, Broom J. Aerosol-generating procedures and infective risk to healthcare  
301 workers from SARS-CoV-2: the limits of the evidence. *J Hosp Infect*. 2020;105(4):717-725.  
302 doi:10.1016/j.jhin.2020.05.037
- 303 3. Guo W, Chan BH, Chng CK, Shi AH. Two Cases of Inadvertent Dental Aerosol Exposure to COVID-  
304 19 Patients. *Ann Acad Med Singapore*. 2020;49(7):514-516. doi:10.47102/annals-  
305 acadmedsg.2020186
- 306 4. Ge Z, Yang L, Xia J, Fu X, Zhang Y. Possible aerosol transmission of COVID-19 and special  
307 precautions in dentistry. *J Zhejiang Univ Sci B*. 2020;21(5):361-368. doi:10.1631/jzus.B2010010
- 308 5. Mick P, Murphy R. Aerosol-generating otolaryngology procedures and the need for enhanced PPE  
309 during the COVID-19 pandemic: A literature review. *J Otolaryngol - Head Neck Surg*.  
310 2020;49(1):1-10. doi:10.1186/s40463-020-00424-7
- 311 6. World Health Organization. *Considerations for the Provision of Essential Oral Health Services in*  
312 *the Context of COVID-19: Interim Guidance, 3 August 2020*. World Health Organization; 2020.
- 313 7. Centers for Disease Control and Prevention. Interim Infection Prevention and Control Guidance  
314 for Dental Settings During the Coronavirus Disease 2019 (COVID-19) Pandemic. Published 2020.  
315 <https://www.cdc.gov/coronavirus/2019-ncov/hcp/dental-settings.html#section-1>
- 316 8. S KN, Eachempati P, Paisi M, Nasser M, Sivaramakrishnan G, Jh V. dental procedures for  
317 preventing infectious diseases ( Review ). Published online 2020.  
318 doi:10.1002/14651858.CD013686.pub2.www.cochranelibrary.com
- 319 9. Peng X, Xu X, Li Y, Cheng L, Zhou X, Ren B. Transmission routes of 2019-nCoV and controls in  
320 dental practice. *Int J Oral Sci*. 2020;12(1):9. doi:10.1038/s41368-020-0075-9
- 321 10. Amato A, Caggiano M, Amato M, Moccia G, Capunzo M, De Caro F. Infection control in dental  
322 practice during the covid-19 pandemic. *Int J Environ Res Public Health*. 2020;17(13):1-12.  
323 doi:10.3390/ijerph17134769
- 324 11. Office of Chief Dental Officer England. Standard operating procedure. Transition to recovery.  
325 2020;(June):2-57. [https://www.england.nhs.uk/coronavirus/wp-](https://www.england.nhs.uk/coronavirus/wp-content/uploads/sites/52/2020/06/C0575-dental-transition-to-recovery-SOP-4June.pdf)  
326 [content/uploads/sites/52/2020/06/C0575-dental-transition-to-recovery-SOP-4June.pdf](https://www.england.nhs.uk/coronavirus/wp-content/uploads/sites/52/2020/06/C0575-dental-transition-to-recovery-SOP-4June.pdf)
- 327 12. The American Conference of Governmental Industrial Hygienists. *Industrial Ventilation: A Manual*  
328 *of Recommended Practice for Design*. 28th ed.; 2013.
- 329 13. Allison JR, Currie CC, Edwards DC, et al. Evaluating aerosol and splatter following dental  
330 procedures: Addressing new challenges for oral health care and rehabilitation. *J Oral Rehabil*.  
331 2020;(August 2020):61-72. doi:10.1111/joor.13098
- 332 14. Dahlke WO, Cottam MR, Herring MC, Leavitt JM, Ditmyer MM, Walker RS. Evaluation of the  
333 spatter-reduction effectiveness of two dry-field isolation techniques. *J Am Dent Assoc*.  
334 2012;143(11):1199-1204. doi:10.14219/jada.archive.2012.0064

- 335 15. Kaufmann M, Solderer A, Gubler A, Wegehaupt FJ, Attin T, Schmidlin PR. Quantitative  
336 measurements of aerosols from air-polishing and ultrasonic devices: (How) can we protect  
337 ourselves? *PLoS One*. 2020;15(12 December):1-10. doi:10.1371/journal.pone.0244020
- 338 16. Holliday R, Allison JR, Currie CC, et al. Evaluating contaminated dental aerosol and splatter in an  
339 open plan clinic environment: Implications for the COVID-19 pandemic. *J Dent*. 2021;105:103565.  
340 doi:10.1016/j.jdent.2020.103565
- 341 17. Harrel SK, Barnes JB, Rivera-Hidalgo F. Aerosol and Splatter Contamination from the Operative  
342 Site during Ultrasonic Scaling. *J Am Dent Assoc*. 1998;129(9):1241-1249.  
343 doi:10.14219/jada.archive.1998.0421
- 344 18. Shahdad S, Patel T, Hindocha A, et al. The efficacy of an extraoral scavenging device on reduction  
345 of splatter contamination during dental aerosol generating procedures: an exploratory study. *Br*  
346 *Dent J*. Published online 2020:1-10. doi:10.1038/s41415-020-2112-7
- 347 19. Harrel SK. Clinical use of an aerosol-reduction device with an ultrasonic scaler. *Compend Contin*  
348 *Educ Dent*. 1996;17(12):1185-1193; quiz 1194.
- 349 20. Chiramana S, O S, Kadiyala K, Prakash M, Prasad T, Chaitanya S. Evaluation of Minimum Required  
350 Safe Distance between Two Consecutive Dental Chairs for Optimal Asepsis. *J Orofac Res*.  
351 2013;3:12-15. doi:10.5005/jp-journals-10026-1056
- 352 21. Zemouri C, Volgenant CMC, Buijs MJ, et al. Dental aerosols: microbial composition and spatial  
353 distribution. *J Oral Microbiol*. 2020;12(1). doi:10.1080/20002297.2020.1762040
- 354 22. Holloman JL, Mauriello SM, Pimenta L, Arnold RR. Comparison of suction device with saliva  
355 ejector for aerosol and spatter reduction during ultrasonic scaling. *J Am Dent Assoc*.  
356 2015;146(1):27-33. doi:10.1016/j.adaj.2014.10.001
- 357 23. Bentley CD, Burkhart NW, Crawford JJ. Evaluating spatter and aerosol contamination during  
358 dental procedures. *J Am Dent Assoc*. 1994;125(5):579-584. doi:10.14219/jada.archive.1994.0093
- 359 24. Timmerman MF, Menso L, Steinfort J, Van Winkelhoff AJ, Van Der Weijden GA. Atmospheric  
360 contamination during ultrasonic scaling. *J Clin Periodontol*. 2004;31(6):458-462.  
361 doi:10.1111/j.1600-051X.2004.00511.x
- 362 25. Zhu N, Zhang D, Wang W, et al. A Novel Coronavirus from Patients with Pneumonia in China,  
363 2019. *N Engl J Med*. 2020;382(8):727-733. doi:10.1056/NEJMoa2001017
- 364 26. Dutil S, Mériaux A, De Latrémoille MC, Lazure L, Barbeau J, Duchaine C. Measurement of airborne  
365 bacteria and endotoxin generated during dental cleaning. *J Occup Environ Hyg*. 2008;6(2):121-  
366 130. doi:10.1080/15459620802633957
- 367 27. Miller RL. Characteristics of Blood-Containing Aerosols Generated by Common Powered Dental  
368 Instruments. *Am Ind Hyg Assoc J*. 1995;56(7):670-676. doi:10.1080/15428119591016683
- 369 28. Bennett AM, Fulford MR, Walker JT, Bradshaw DJ, Martin M V, Marsh PD. Microbial aerosols in  
370 general dental practice. *Br Dent J*. 2000;189(12):664-667. doi:10.1038/sj.bdj.4800859
- 371 29. Jacks ME. A laboratory comparison of evacuation devices on aerosol reduction. *J Dent Hyg*.  
372 2002;76(3):202-206.
- 373 30. Matys J, Grzech-Leśniak K. Dental aerosol as a hazard risk for dental workers. *Materials (Basel)*.

- 374 2020;13(22):1-13. doi:10.3390/ma13225109
- 375 31. Nulty A, Lefkaditis C, Zachrisson P, Van Tonder Q, Yar R. A clinical study measuring dental  
376 aerosols with and without a high-volume extraction device. *Br Dent J*. Published online 2020:1-8.  
377 doi:10.1038/s41415-020-2274-3
- 378 32. Liu F, Qian H, Zheng X, Song J, Cao G, Liu Z. Evaporation and dispersion of exhaled droplets in  
379 stratified environment. *IOP Conf Ser Mater Sci Eng*. 2019;609(4). doi:10.1088/1757-  
380 899X/609/4/042059
- 381 33. Liu F, Zhang C, Qian H, Zheng X, Nielsen P V. Direct or indirect exposure of exhaled contaminants  
382 in stratified environments using an integral model of an expiratory jet. *Indoor Air*.  
383 2019;29(4):591-603. doi:10.1111/ina.12563
- 384 34. Zhou Q, Qian H, Ren H, Li Y, Nielsen P V. The lock-up phenomenon of exhaled flow in a stable  
385 thermally-stratified indoor environment. *Build Environ*. 2017;116:246-256.  
386 doi:10.1016/j.buildenv.2017.02.010
- 387 35. Sawhney A, Venugopal S, Girish Babu RJ, et al. Aerosols how dangerous they are in clinical  
388 practice. *J Clin Diagnostic Res*. 2015;9(4):52-57. doi:10.7860/JCDR/2015/12038.5835
- 389 36. Harrel SK, Barnes JB, Rivera-Hidalgo F. Reduction of Aerosols Produced by Ultrasonic Sealers. *J*  
390 *Periodontol*. 1996;67(1):28-32. doi:10.1902/jop.1996.67.1.28
- 391 37. Teanpaisan R, Taeporamaysamai M, Rattanachone P, Poldoung N, Srisintorn S. The usefulness of  
392 the modified extra-oral vacuum aspirator (EOVA) from household vacuum cleaner in reducing  
393 bacteria in dental aerosols. *Int Dent J*. 2001;51(6):413-416. doi:10.1002/j.1875-  
394 595X.2001.tb00853.x
- 395 38. Junevicius J, Surna A, Surna R. Effectiveness evaluation of different suction systems.  
396 *Stomatologija*. 2005;7(2):52-57.
- 397 39. Shao S, Li C, Hong J. A hybrid image processing method for measuring 3D bubble distribution  
398 using digital inline holography. *Chem Eng Sci*. 2019;207:929-941. doi:10.1016/j.ces.2019.07.009
- 399 40. Hinds WC. Aerosol technology: properties, behaviour, and measurement of airborne particles.  
400 Published online 1982. Accessed January 24, 2021. [https://www.wiley.com/en-](https://www.wiley.com/en-us/Aerosol+Technology%3A+Properties%2C+Behavior%2C+and+Measurement+of+Airborne+Particles%2C+2nd+Edition-p-9780471194101)  
401 [us/Aerosol+Technology%3A+Properties%2C+Behavior%2C+and+Measurement+of+Airborne+Part](https://www.wiley.com/en-us/Aerosol+Technology%3A+Properties%2C+Behavior%2C+and+Measurement+of+Airborne+Particles%2C+2nd+Edition-p-9780471194101)  
402 [icles%2C+2nd+Edition-p-9780471194101](https://www.wiley.com/en-us/Aerosol+Technology%3A+Properties%2C+Behavior%2C+and+Measurement+of+Airborne+Particles%2C+2nd+Edition-p-9780471194101)
- 403 41. Pei C, Ou Q, Kim SC, Chen S-C, Pui DYH. Alternative Face Masks Made of Common Materials for  
404 General Public: Fractional Filtration Efficiency and Breathability Perspective. *Aerosol Air Qual Res*.  
405 2020;20(Viii):2581-2591. doi:10.4209/aaqr.2020.07.0423
- 406 42. Ou Q, Pei C, Chan Kim S, Abell E, Pui DYH. Evaluation of decontamination methods for  
407 commercial and alternative respirator and mask materials – view from filtration aspect. *J Aerosol*  
408 *Sci*. 2020;150:105609. doi:10.1016/j.jaerosci.2020.105609
- 409 43. Konda A, Prakash A, Moss GA, Schmoldt M, Grant GD, Guha S. Aerosol Filtration Efficiency of  
410 Common Fabrics Used in Respiratory Cloth Masks. *ACS Nano*. 2020;14(5):6339-6347.  
411 doi:10.1021/acsnano.0c03252
- 412 44. Park M, Snyder SA. Attenuation of contaminants of emerging concerns by nanofiltration



- 413 membrane: rejection mechanism and application in water reuse. In: *Contaminants of Emerging*  
414 *Concern in Water and Wastewater*. Elsevier; 2020:177-206. doi:10.1016/B978-0-12-813561-  
415 7.00006-7
- 416 45. Quench - a Culligan company. What's in Your Water: Total Dissolved Solids (TDS) in Drinking  
417 Water. Published 2019. <https://quenchwater.com/blog/tds-in-drinking-water/>
- 418 46. Li A, Kosonen R, Hagström K. Industrial ventilation design method. In: *Industrial Ventilation*  
419 *Design Guidebook*. ; 2020:19-37. doi:10.1016/b978-0-12-816780-9.00003-4
- 420



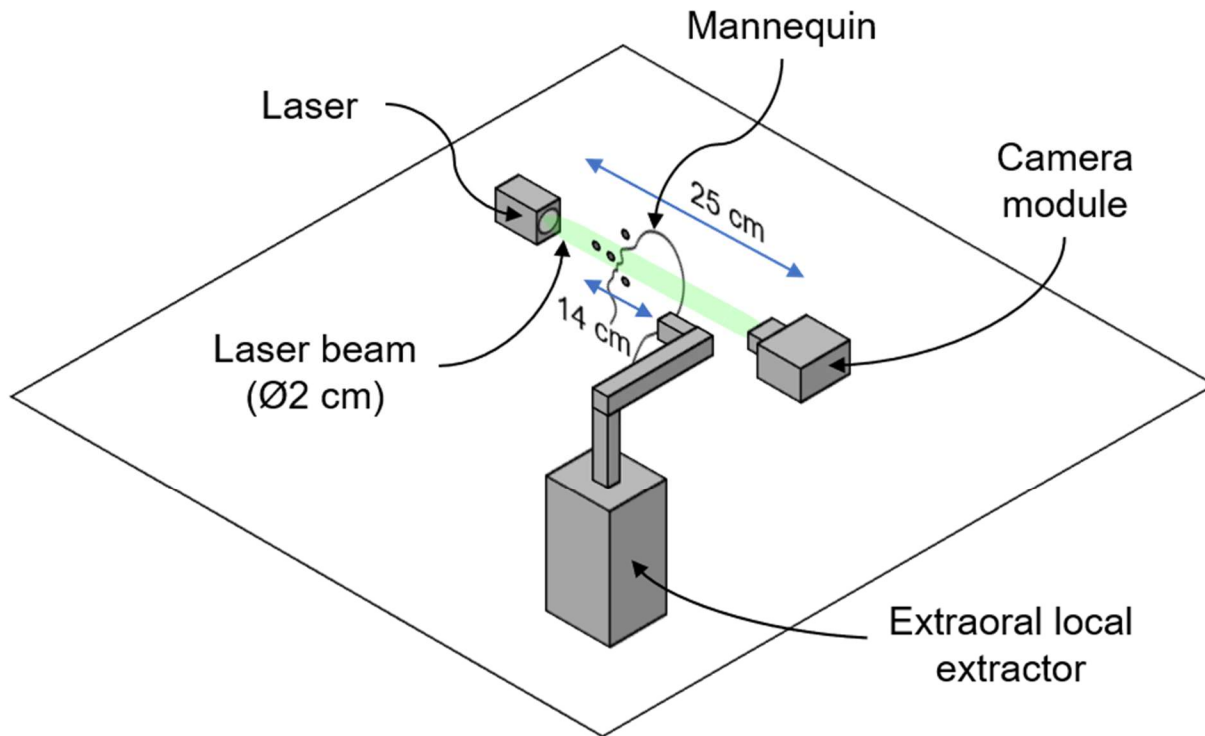

421

422 Figure 1. Schematic of DIH setup used for near-field aerosol size and velocity measurements.  
423 The DIH system is mounted onto a cage system secured to a table (not shown) and incorporates  
424 beam expanding, collimating and condensing optics (also not shown). A detailed description of  
425 the system can be found in Supplementary Information.

426

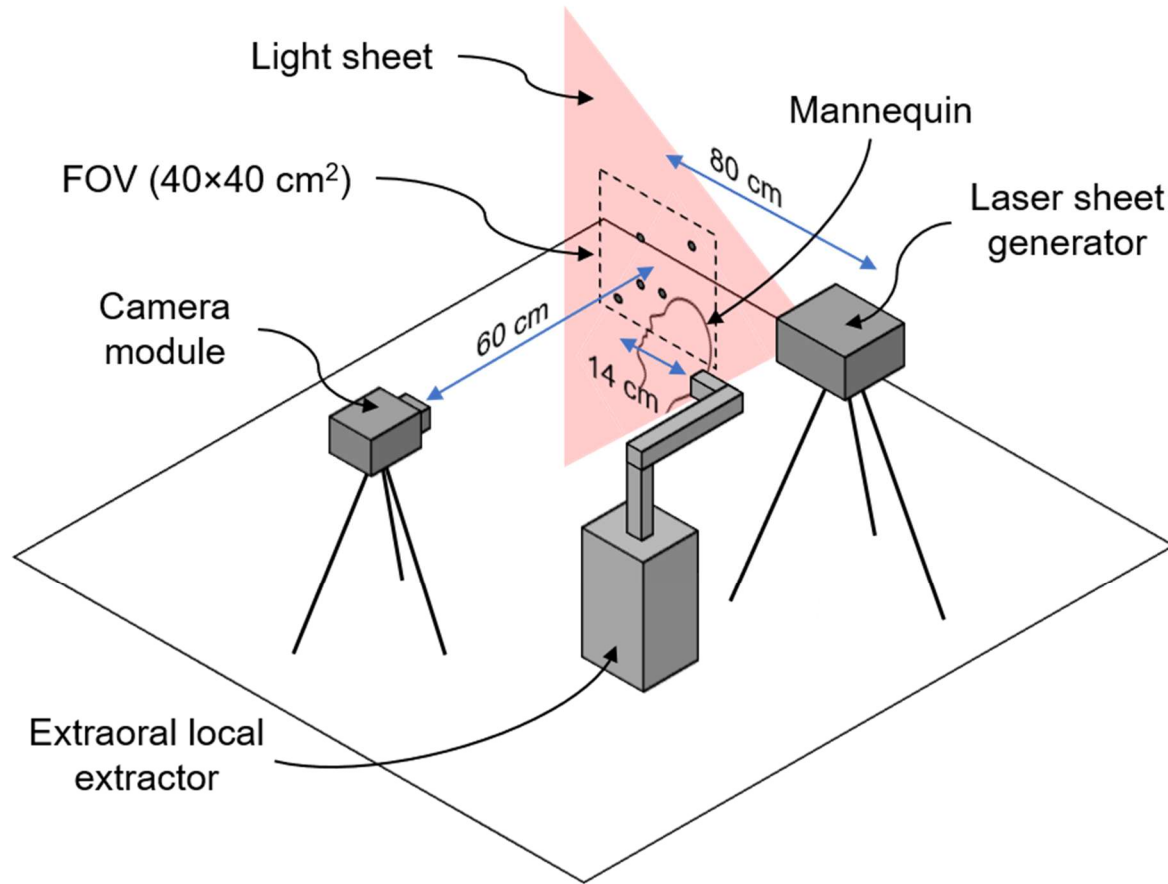

427

428 Figure 2. Schematic of LSI setup used for far-field plume and splatter measurements. The  
429 camera module incorporates a camera sensor, image intensifier and imaging lens, and the laser  
430 sheet generator is composed of a high-power laser and a set of optical lenses. A detailed  
431 description of the system can be found in Supplementary Information.

432

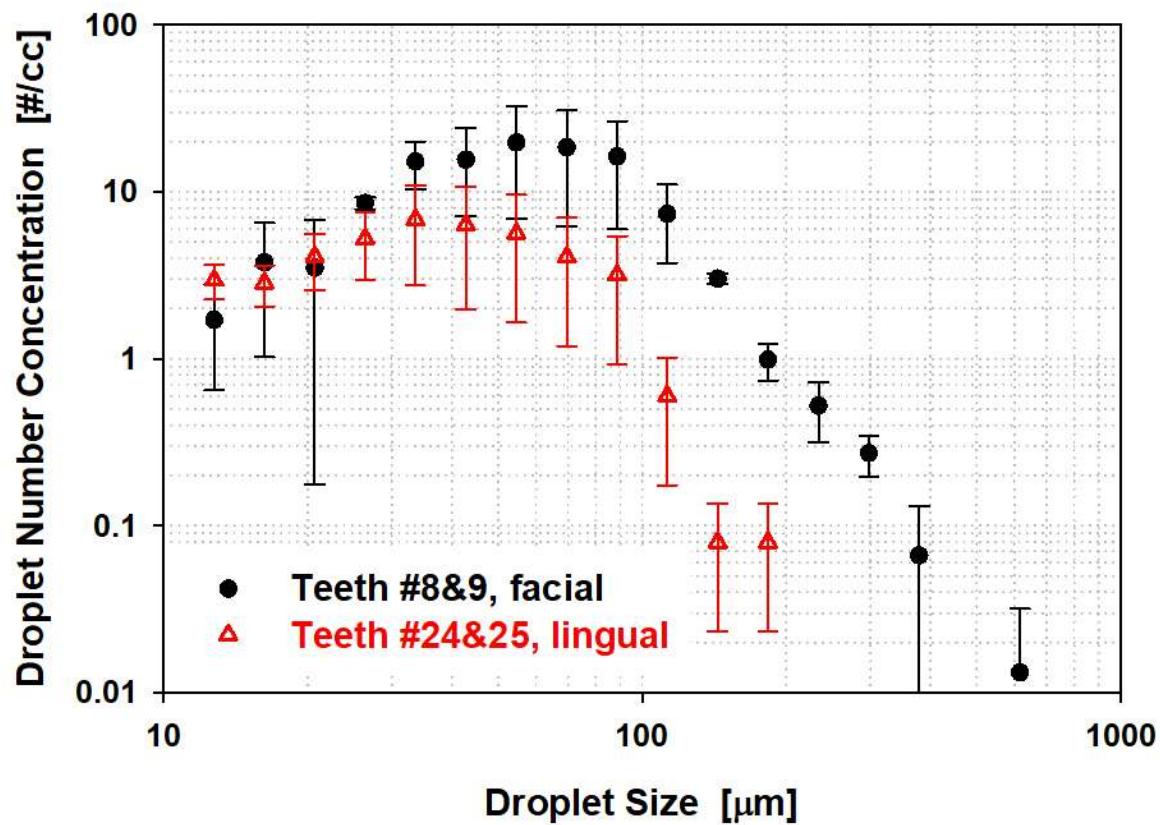

433

434 Figure 3. Size distribution of droplets as measured by DIH. (Error bars represent standard  
435 deviations of three measurements.)

436

437

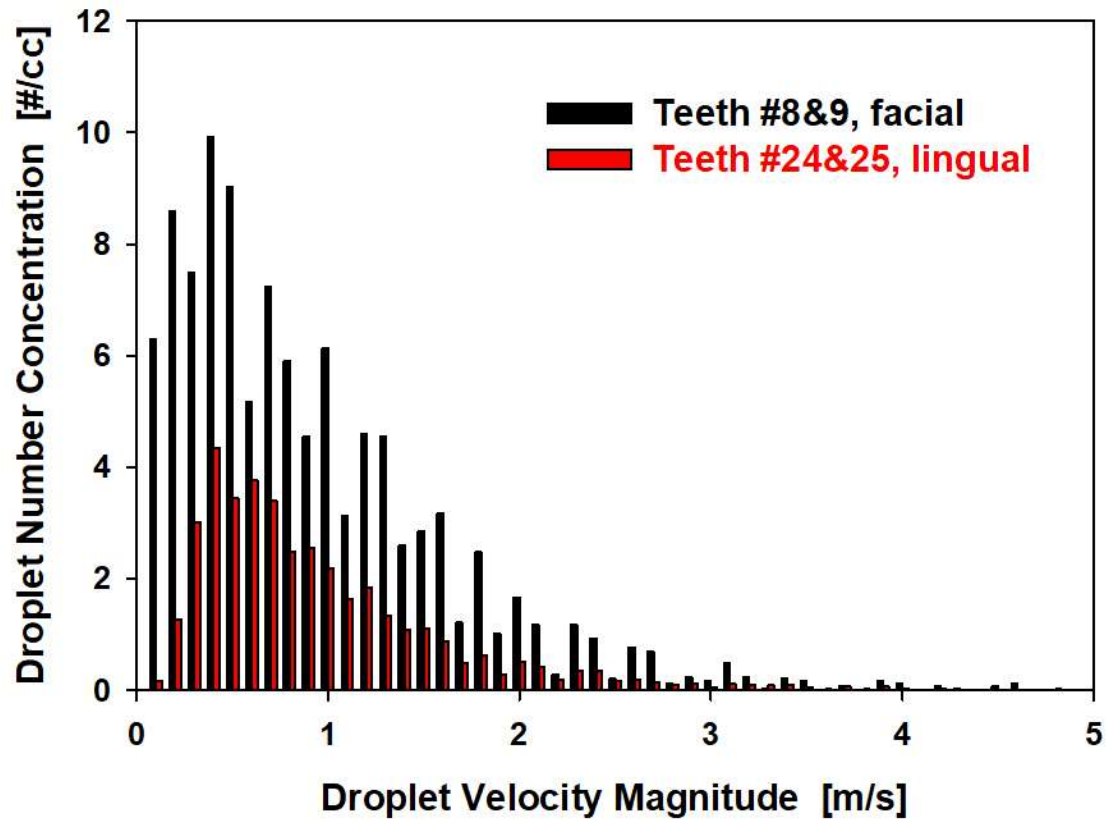

438

439 Figure 4. The velocity distribution of droplets as measured by DIH

440

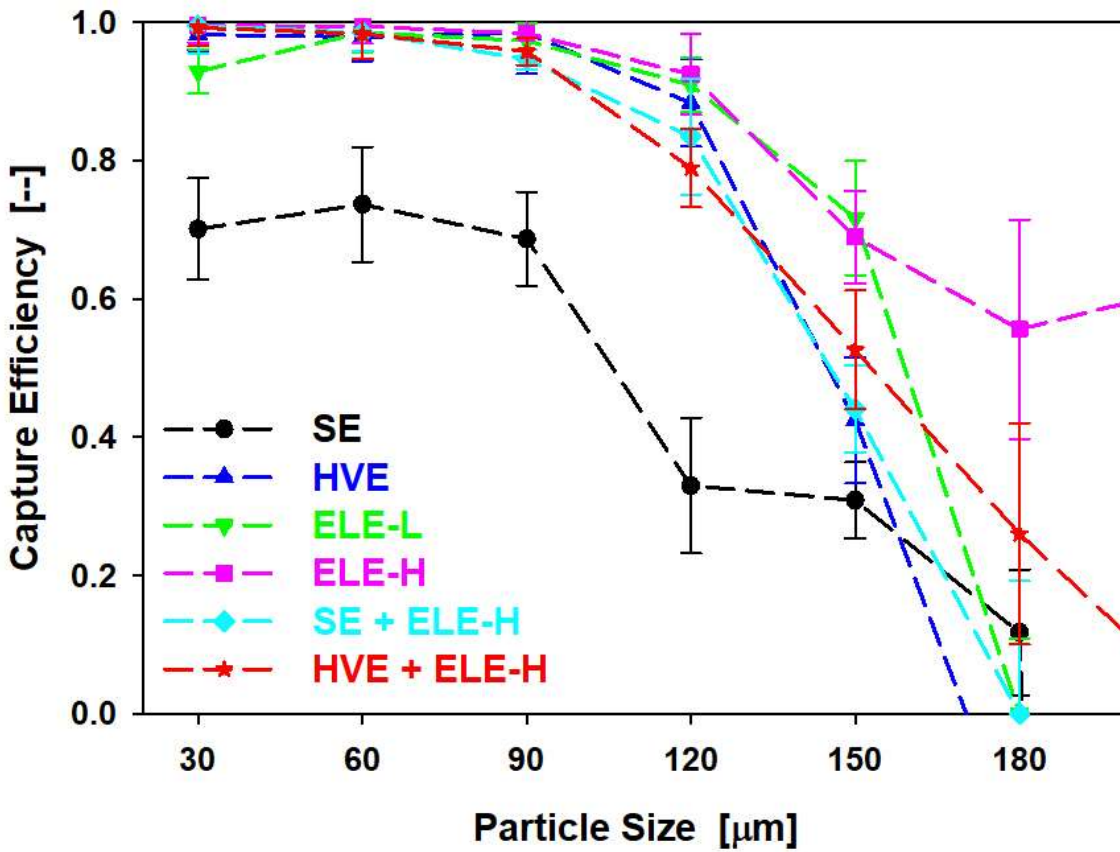

441

442 Figure 5. Size dependent capture efficiency of various mitigation device(s) by DIH when cleaning  
443 facial surface of teeth #8 & 9. (SE: saliva ejector; HVE: high-volume evacuation; ELE-L: extraoral  
444 local extractor at low flow setting; ELE-H: local extractor at high flow setting; '+' denotes a  
445 combination of two devices. Error bars represent standard deviations of three measurements.)

446

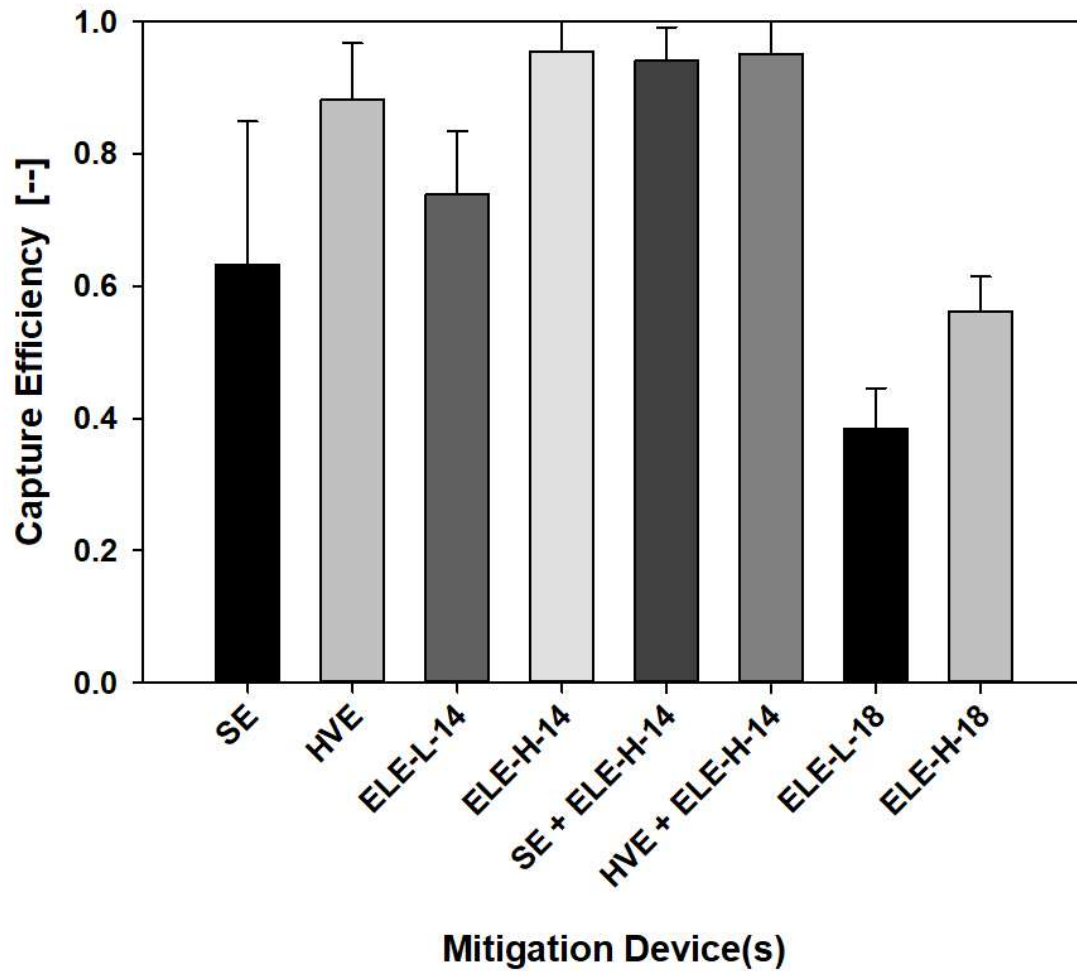

447

448 Figure 6. Capture efficiency of various mitigation device(s) by LSI when cleaning facial surface of  
449 teeth #8 & 9. (SE: saliva ejector; HVE: high-volume evacuation; ELE-L-#: local extractor at low  
450 flow setting at a distance of # cm; ELE-H-#: local extractor at high flow setting at a distance of #  
451 cm; '+' denotes a combination of two devices. Error bars represent standard deviations of three  
452 measurements.)

453
